# Supplementary material for: Arginine is neuroprotective through suppressing HIF-1α/LDHA-mediated inflammatory response after cerebral ischemia/reperfusion injury
Source: PubMed Central journal article supplement (PMC7175589; doi:10.1186/s13041-020-00601-9), 2020-04-22
Supplement: 13041_2020_601_MOESM1_ESM.pdf [file 13041_2020_601_MOESM1_ESM.pdf]

## **Arginine is neuroprotective through suppressing HIF-1 $\alpha$ /LDHA-mediated inflammatory response after cerebral ischemia/reperfusion injury**

Song-Feng Chen<sup>1\*</sup>, Meng-Xian Pan<sup>1\*</sup>, Jun-Chun Tang<sup>1</sup>, Jing Cheng<sup>2</sup>, Dan Zhao<sup>3</sup>, Ya Zhang<sup>1</sup>, Hua-Bao Liao<sup>1</sup>, Rui Liu<sup>1</sup>, Yang Zhuang<sup>1</sup>, Zhi-Feng Zhang<sup>3</sup>, Juan Chen<sup>4</sup>, Rui-Xue Lei<sup>1</sup>, Shi-Fang Li<sup>5</sup>, Huan-Ting Li<sup>5</sup>, Ze-Fen Wang<sup>1</sup>, Qi Wan<sup>5</sup>

<sup>1</sup> Department of Physiology, School of Basic Medical Sciences, Wuhan University School of Medicine, 185 Donghu Street, Wuhan 430071, China

<sup>2</sup> Department of Neurosurgery, Renmin Hospital of Wuhan University, 99 Zhang Zhidong Rd, Wuhan 430060, China

<sup>3</sup> Department of Physiology, School of Basic Medical Sciences, Hubei University of Medicine, 30 South Renmin Road, Shiyan, Hubei, 442000 China

<sup>4</sup> Department of Neurology, the Central Hospital of Wuhan, Tongji Medical College, Huazhong University of Science & Technology, 26 Shengli Street, Wuhan 430013, China

<sup>5</sup> Institute of Neuroregeneration & Neurorehabilitation, Department of Neurosurgery & Pathophysiology, Qingdao University, 308 Ningxia Street, Qingdao 266071, China

\*These authors contributed equally to this work.

Correspondence:

Qi Wan, Institute of Neuroregeneration & Neurorehabilitation, Qingdao University, 308 Ningxia Street, Qingdao 266071, China

Email: qwanwh@hotmail.com

Ze-Fen Wang, Department of Physiology, School of Basic Medical Sciences, Wuhan University School of Medicine, 185 Donghu Street, Wuhan 430071, China

Email: 964434321@qq.com

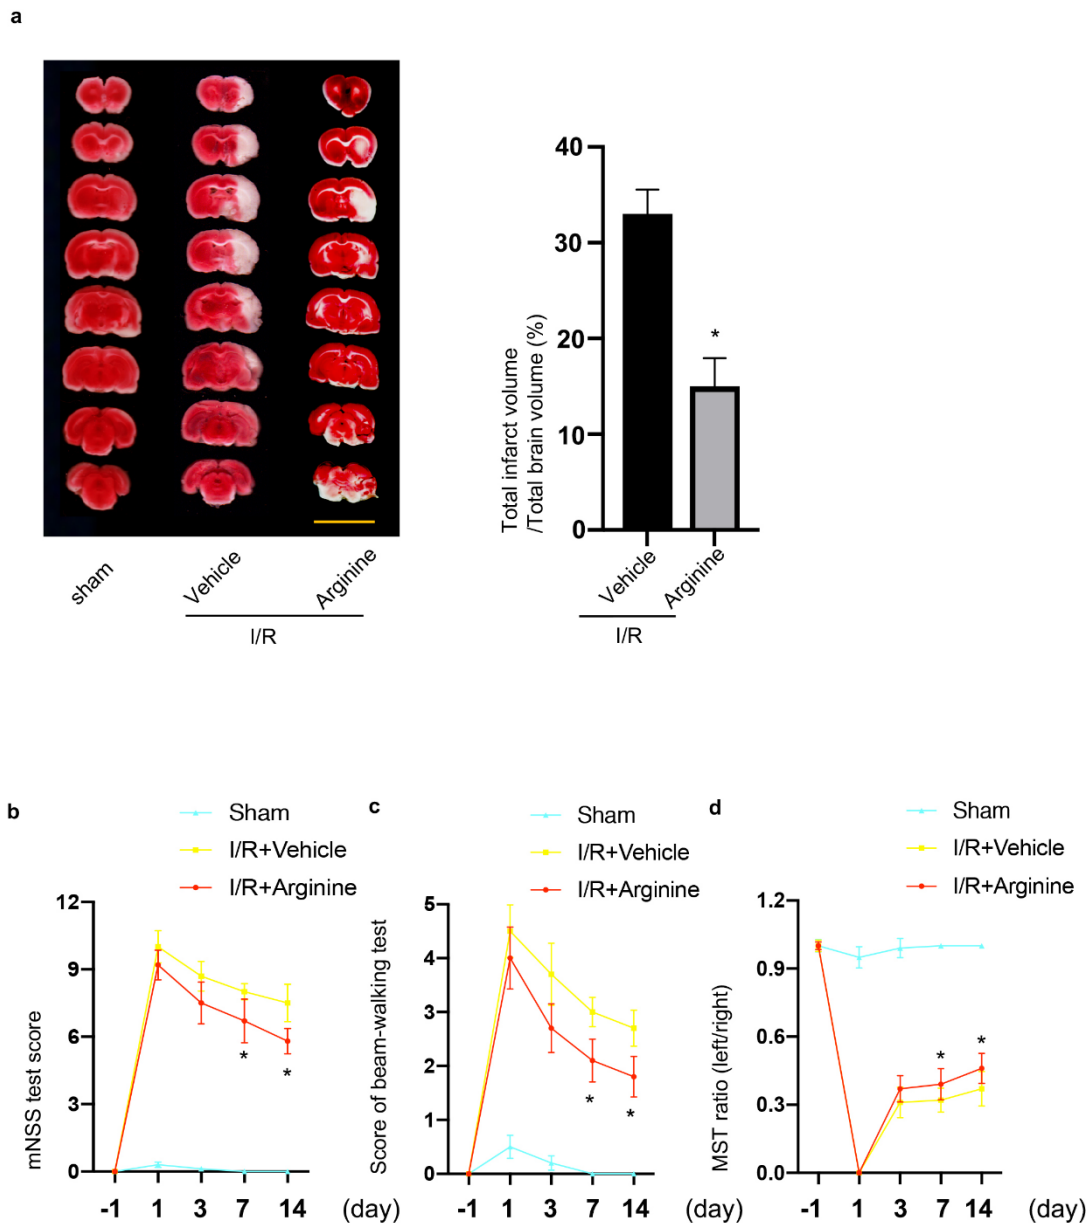

**Supplement Fig 1. Arginine is neuroprotective after rat cerebral ischemia/reperfusion injury.** (a) TTC staining (left) shows the infarct region after 24 h following I/R insult and quantification analysis (right) of the infarct volume shows that arginine administration reduces I/R-induced infarct volume ( $n = 6$  in each group,  $*p < 0.05$  versus the I/R + vehicle, Student's t-test). (Scale bar, 5 mm). (b) Arginine treated rats have lower scores in the mNSS test on days 7 and 14 after I/R injury compared to rats in the I/R + vehicle group. ( $n = 6$  in each group,  $*p < 0.05$  versus I/R + vehicle, two-way ANOVA test). (c) Arginine treated rats have lower scores in the beam-walking test on days 7 and 14 after I/R injury compared to rats in the I/R + vehicle group. ( $n = 6$  in each group,  $*p < 0.05$  versus the I/R + vehicle, two-way ANOVA test). (d) Arginine treated rats have higher a ratio in the MST test at days 7 and 14 after I/R injury compared to rats in the I/R + vehicle group ( $n = 6$  in each group,  $*p < 0.05$  versus the I/R + vehicle, two-way ANOVA test).

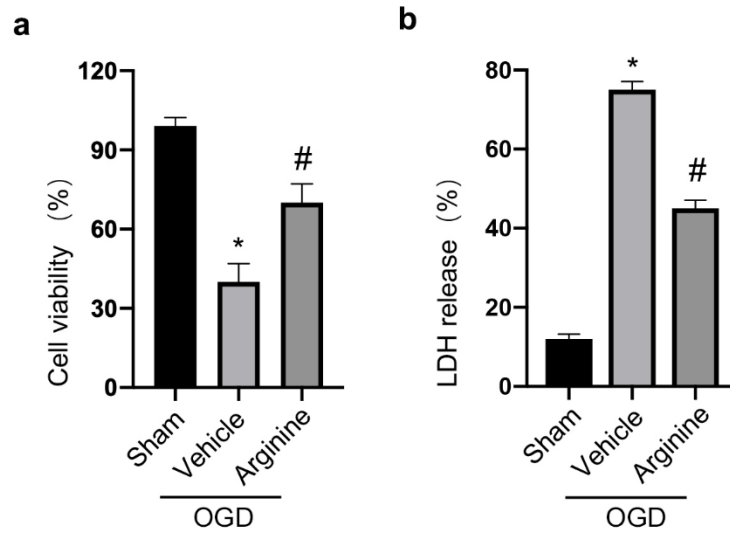

**Supplement Fig 2. Arginine administration to microglia co-cultured with neuron in Transwell system is neuroprotective in OGD insult. (a, b)** Cell viability test (a) and LDH release test (b) show that administration of arginine to microglia reduces neuron death after OGD insult (n = 6 in each group, \*p < 0.05 versus Sham, #p < 0.05 versus Vehicle, one-way ANOVA test).

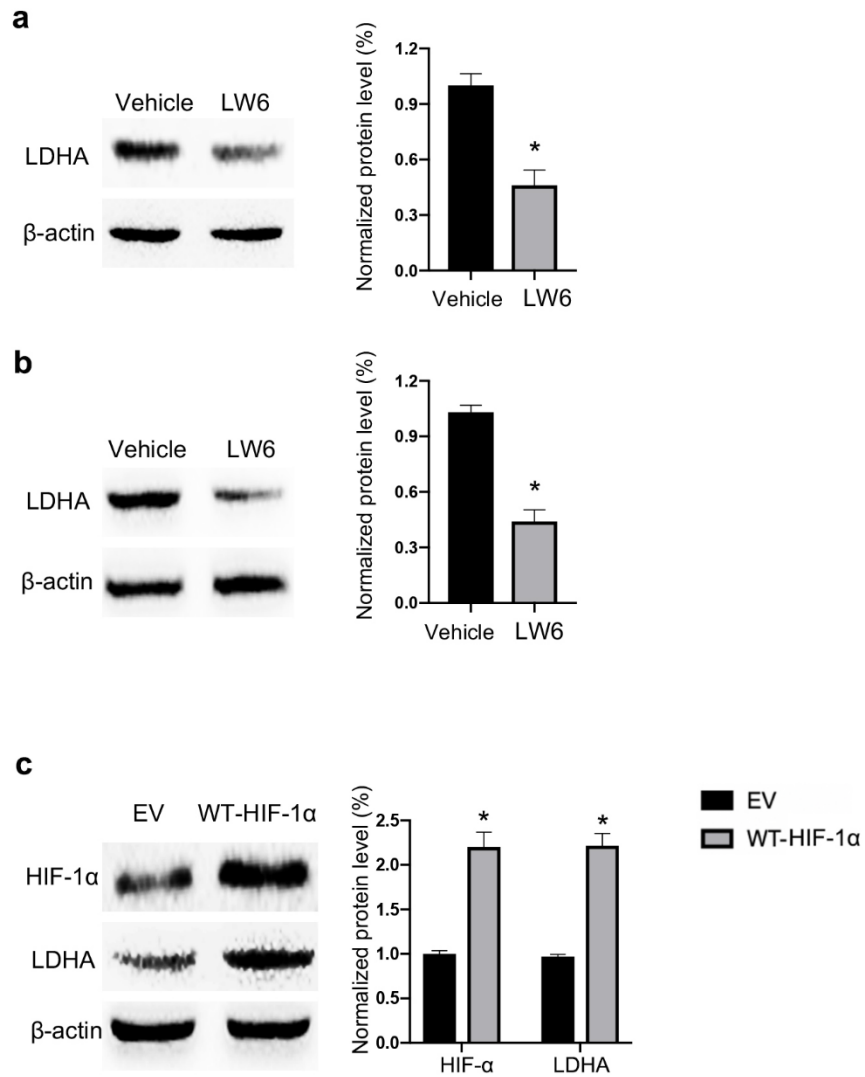

**Supplement Fig 3. Regulation of LDHA by HIF-1 $\alpha$ .** (a, b) Western blotting shows that LW6 inhibits LDHA protein level in rats (a) and cultured primary microglia (b) (n = 6 in each group, \*p < 0.05 versus vehicle, Student's t-test). (c) Western blotting shows transfection of WT-HIF-1 $\alpha$  increases LDHA protein level in BV-2 cell line (n = 6 in each group, \*p < 0.05 versus EV, two-way ANOVA test).

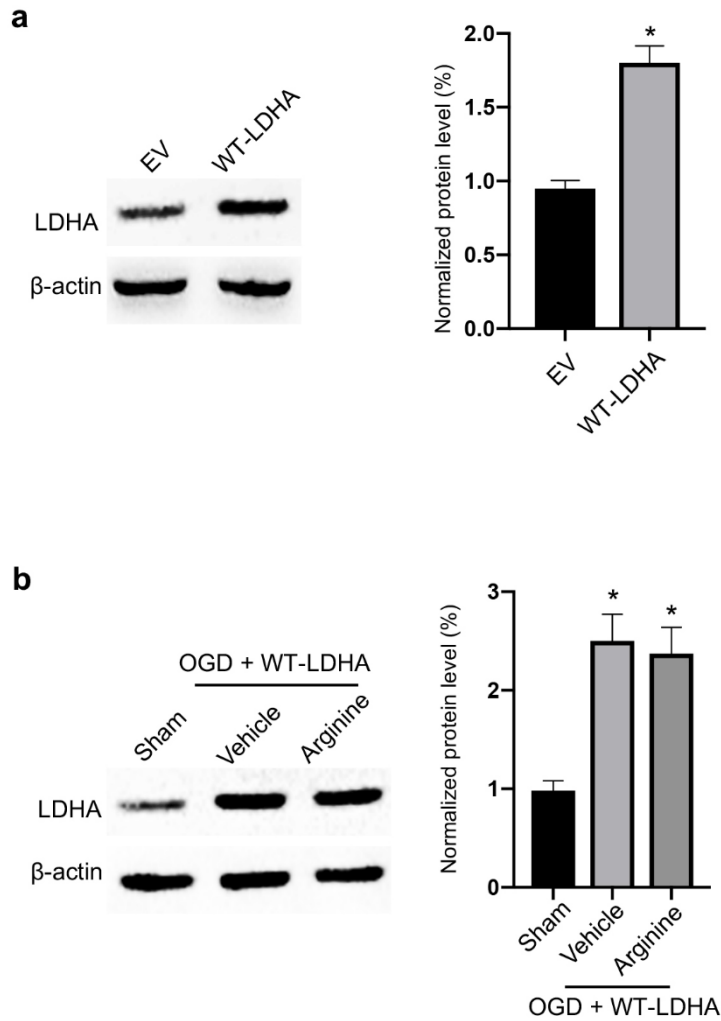

**Supplement Fig 4. Regulation of LDHA by arginine after transfection of LDHA and OGD.** (a) Western blotting shows transfection of LDHA upregulates LDHA expression in BV-2 cell line (n = 6 in each group, \*p < 0.05 versus EV, Student's t-test). (b) Western blotting shows LDHA overexpression maintains the expression level of LDHA after OGD insult in BV-2 cell line administrated with arginine (n = 6 in each group, \*p < 0.05 versus OGD, one-way ANOVA test).

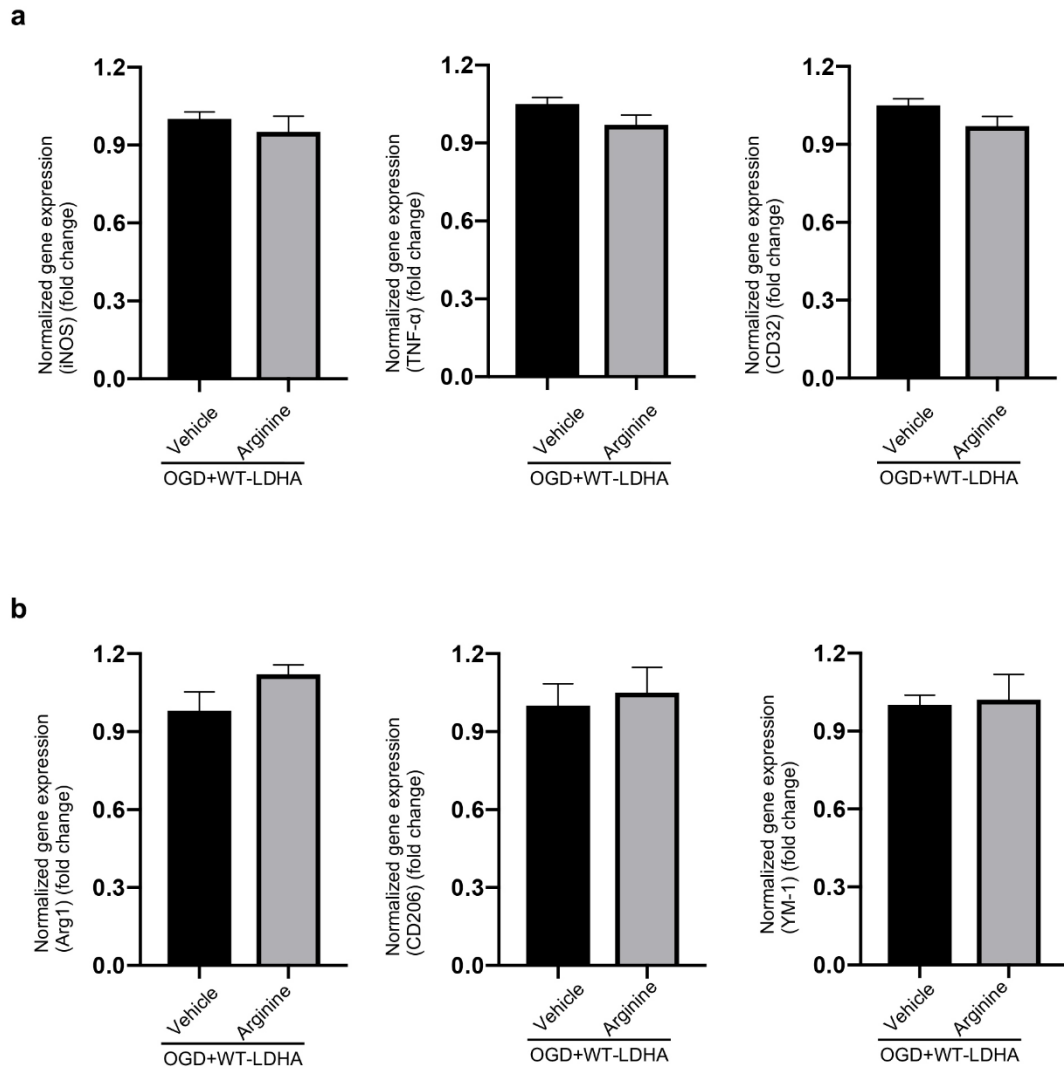

**Supplement Fig 5. Arginine-mediated inhibition of inflammatory response is blocked by transfection of LDHA in OGD BV-2 cell line. (a, b) Pro-inflammatory markers (a) and anti-inflammatory markers (b) in FX11 group showed no significance from FX11 + arginine group (n = 6 in each group, Student's t-test).**
